# Supplementary material for: Allopurinol Lowers Serum Urate but Does Not Reduce Oxidative Stress in CKD
Source: MDPI journal article supplement (doi:10.3390/antiox11071297), 2022-06-29
Supplement: s1 [file s1]

**Table S1.** Baseline characteristics of the subjects included *vs.* those excluded from this analysis.

| Characteristic                             | Analysis Sample (n=28) | Excluded Observations (n=52) | p-value |
|--------------------------------------------|------------------------|------------------------------|---------|
| Age (years)                                | 60 ± 11                | 59 ± 11                      | 0.85    |
| Male sex (n[%])                            | 21 (75)                | 43 (83)                      | 0.41    |
| Race (n[%])                                |                        |                              | 0.13    |
| Caucasian                                  | 22 (79)                | 37 (71)                      |         |
| African American                           | 2 (7)                  | 12 (23)                      |         |
| Other                                      | 4 (14)                 | 3 (6)                        |         |
| Baseline diabetes (n[%])                   | 18 (64)                | 30 (59)                      | 0.63    |
| Baseline CVD (n[%])                        | 12 (43)                | 24 (47)                      | 0.72    |
| Systolic BP (mmHg)                         | 128 ± 15               | 129 ± 16                     | 0.92    |
| Diastolic BP (mmHg)                        | 76 ± 10                | 79 ± 9                       | 0.19    |
| BMI (kg/m <sup>2</sup> )                   | 33.5 ± 4.7             | 31.6 ± 5.4                   | 0.08    |
| Hemoglobin A <sub>1c</sub> (%)             | 13.7 ± 1.6             | 13.7 ± 1.8                   | 0.86    |
| Creatinine (mg/dL)                         | 1.8 ± 0.4              | 1.8 ± 0.4                    | 0.35    |
| CKD- EPI eGFR (mL/min/1.73m <sup>2</sup> ) | 39.3 ± 9.3             | 43.4 ± 9.4                   | 0.07    |
| ACR (mg/g)                                 | 414 ± 570              | 421 ± 645                    | 0.21    |
